# Supplementary material for: Application of Deep Learning to Predict Human Oral Bioavailability of Pharmaceuticals
Source: Research Square preprint supplement (doi:10.21203/rs.3.rs-6590945/v1), 2025-05-21
Supplement: Supplementary file 1 [file 03b0e8c6253de23410c00aa1.docx]

Supplementary Information

**Application of Deep Learning to Predict Human Oral Bioavailability of Pharmaceuticals**

Lin Weia,1, Yihe Fanga,1, Peng Chena, Zigong Weia,b,*

aState Key Laboratory of Biocatalysis and Enzyme Engineering, School of Life Sciences, Hubei University, Wuhan, Hubei, PR China

bHubei Province Key Laboratory of Biotechnology of Chinese Traditional Medicine, National & Local Joint Engineering Research Center of High-throughput Drug Screening Technology, School of life sciences, Hubei University, Wuhan, Hubei, PR China

*Corresponding author: Zigong Wei, E-mail: [weizigong@163.com](mailto:weizigong@163.com); weizigong@hubu.edu.cn

1These authors contributed equally to this work.

**Table S1**. The AUC, PRC, ACC, F1 for 20-ensemble learning.

| ID | AUC | PRC | ACC | F1 |
| --- | --- | --- | --- | --- |
| 0 | 0.804 | 0.857 | 0.759 | 0.795 |
| 1 | 0.817 | 0.874 | 0.787 | 0.828 |
| 2 | 0.826 | 0.878 | 0.794 | 0.836 |
| 3 | 0.83 | 0.875 | 0.759 | 0.779 |
| 4 | 0.847 | 0.891 | 0.801 | 0.849 |
| 5 | 0.827 | 0.882 | 0.773 | 0.816 |
| 6 | 0.827 | 0.883 | 0.759 | 0.819 |
| 7 | 0.831 | 0.892 | 0.773 | 0.816 |
| 8 | 0.822 | 0.876 | 0.780 | 0.829 |
| 9 | 0.831 | 0.892 | 0.773 | 0.812 |
| 10 | 0.829 | 0.891 | 0.773 | 0.816 |
| 11 | 0.815 | 0.85 | 0.787 | 0.837 |
| 12 | 0.848 | 0.894 | 0.773 | 0.800 |
| 13 | 0.82 | 0.886 | 0.773 | 0.824 |
| 14 | 0.839 | 0.892 | 0.773 | 0.814 |
| 15 | 0.824 | 0.862 | 0.759 | 0.785 |
| 16 | 0.844 | 0.886 | 0.801 | 0.839 |
| 17 | 0.833 | 0.892 | 0.773 | 0.816 |
| 18 | 0.842 | 0.89 | 0.752 | 0.802 |
| 19 | 0.841 | 0.895 | 0.809 | 0.842 |

**Table S2.** The HOB prediction for *FDA_T* set predicted by our model (with RDKit), PhaKinPro, HobPre, ADMETlab3.0, ADMETSAR3.0 and ADMETAI.

| Name | real_HOB | our_model | PhaKinPro | Hobpre | ADMET-lab3 | ADMET-sar3 | ADEMT-AI |
| --- | --- | --- | --- | --- | --- | --- | --- |
| Elacestrant | 10% | 36% | >80% | 35.88% | 7% | 42% | 71% |
| Vorasidenib | 34% | 58% | <50% | 59.19% | 94% | 83% | 81% |
| Gepotidacin | 45% | 48% | >80% | 42.51% | 6% | 59% | 34% |
| Ritlecitinib | 64% | 51% | <50% | 66.55% | 13% | 56% | 80% |
| Daprodustat | 65% | 54% | 0.5-0.8 | 41.70% | 100% | 41% | 89% |
| Guizartinib | 71% | 52% | >80% | 34.06% | 0% | 30% | 79% |
| Inavolisib | 76% | 51% | <50% | 63.69% | 96% | 64% | 97% |
| Mavacamten | 85% | 53% | <50% | 65.59% | 9% | 89% | 79% |
| pirtobrutinib | 86% | 43% | 0.5-0.8 | 51.06% | 100% | 87% | 93% |
| Deuruxolitinib | 90% | 56% | <50% | 58.10% | 100% | 55% | 40% |
| Momelotinib | 97% | 56% | >80% | 58.06% | 2% | 77% | 89% |
| Lenacapavir | 6-10% | 64% | >80% | 46.16% | 88% | 25% | 77% |


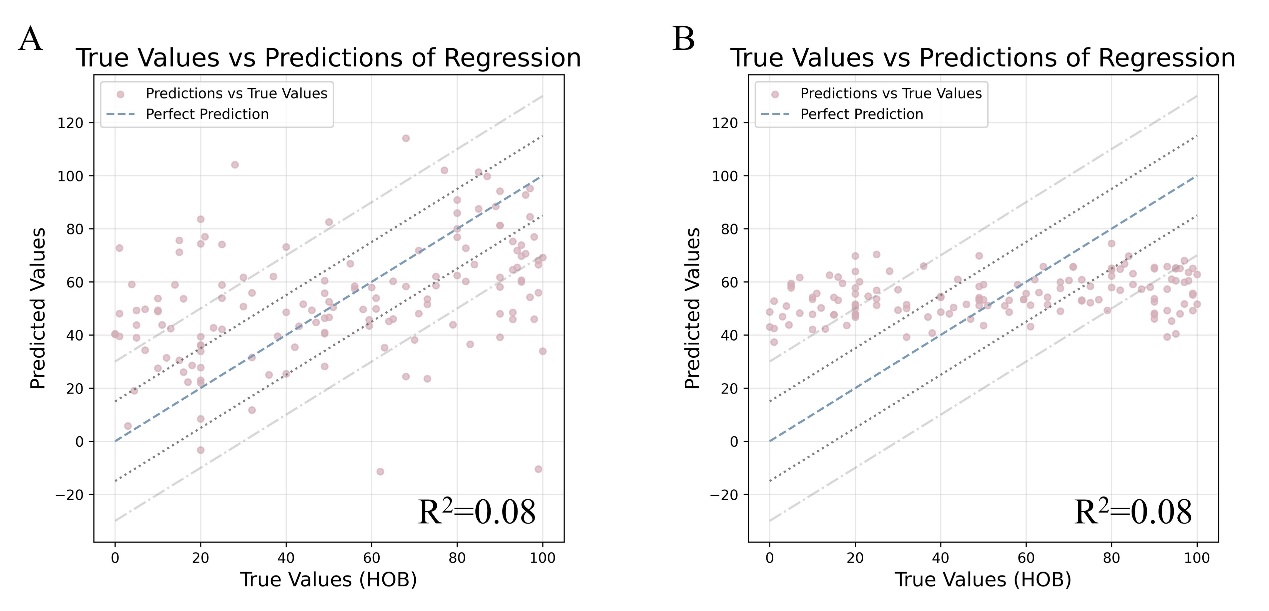


**Fig. S1**. The predicted HOB values vs. true values by our model without RDKit (A) and with RDKit (B).


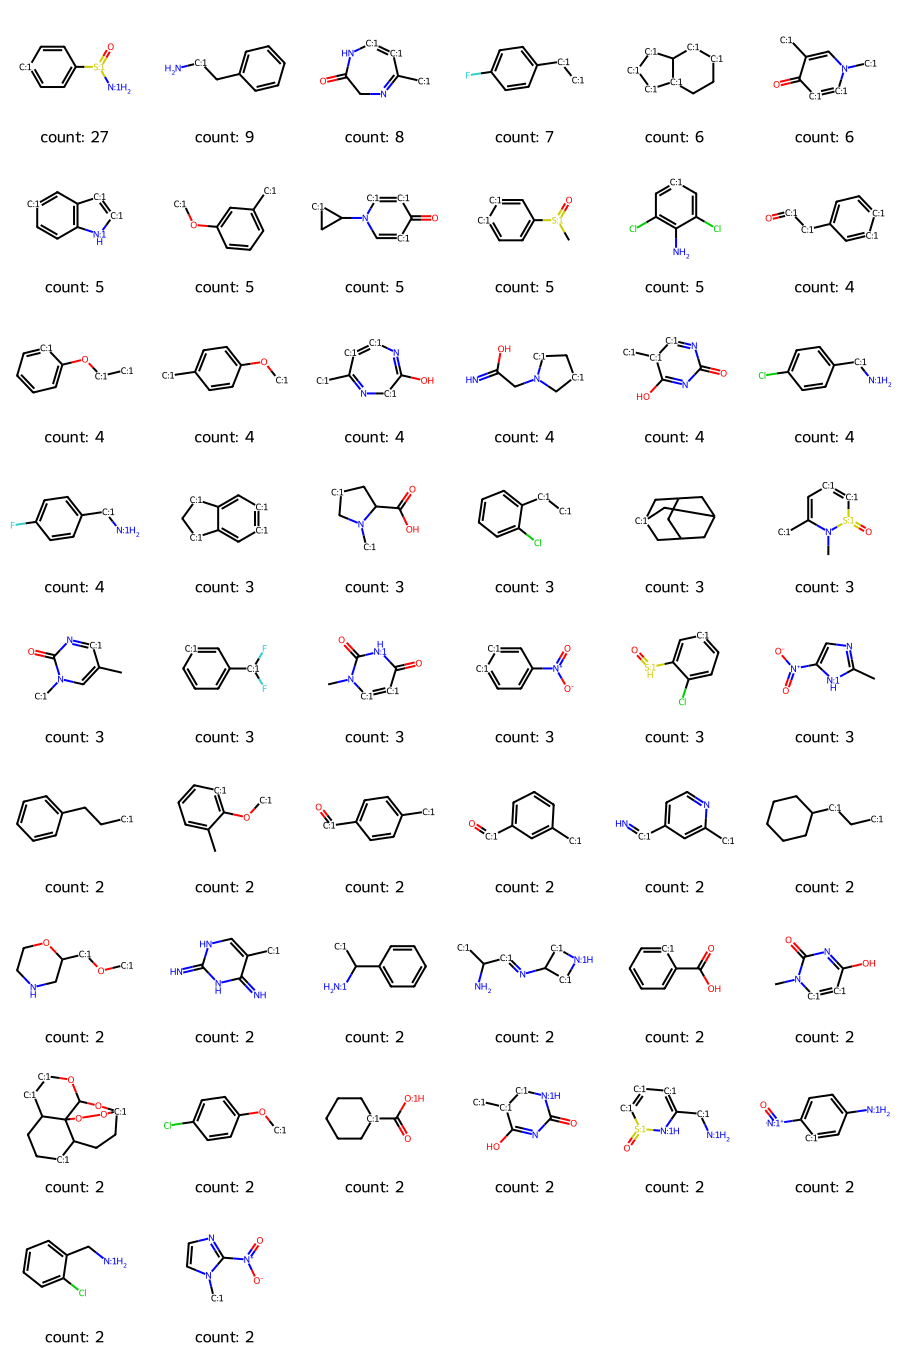


**Fig. S2.** The all substructures associated with HOB classification.
